# Supplementary material for: Serum Metabolic Profiling of Late-Pregnant Women With Antenatal Depressive Symptoms
Source: Front Psychiatry. 2021 Jul 8;12:679451. doi: 10.3389/fpsyt.2021.679451 (PMC8295540; doi:10.3389/fpsyt.2021.679451)
Supplement: Supplementary file 5 [file Table_5.XLSX]

## Sheet: MS2  score ≥0.8
	group		MS2 score	HMDB	ESI+/-	Chinese.Name	Class	Sub.Class	AD	AD	AD	AD	AD	AD	AD	AD	AD	AD	AD	AD	AD	AD	AD	AD	AD	AD	AD	AD	NAD	NAD	NAD	NAD	NAD	NAD	NAD	NAD	NAD	NAD	NAD	NAD	NAD	NAD	NAD	NAD	NAD	NAD	NAD	NAD	NAD
No	id	MS2 name	MS2 score	HMDB	lable	lable	lable	lable	D1235	D1534	D1834	D2234	D2436	D2734	D2834	D3136	D3636	D3834	D4134	D4336	D4536	D534	D634	D835	D2936	D4836	D22A	D9A	N1036	N1136	N1335	N1435	N1636	N1734	N1934	N2035	N2135	N2336	N234	N2635	N3035	N3235	N3334	N334	N3436	N3535	N3735	N3934	N4034
1	173	L-Glutamic acid	0.844087	HMDB0000148	neg	L-谷氨酸	Amino acids	Amino acids, peptides, and analogues	2.90534	1.12569	2.24958	1.47304	2.43617	1.59366	1.54315	1.05931	1.42298	1.40332	1.38429	4.37631	2.13973	1.84034	1.60642	0.612241	1.27998	1.86193	4.64082	3.70071	1.91237	4.28965	2.43641	3.5846	1.57786	0.564266	3.11637	3.59986	1.65198	4.65913	1.41074	1.62926	3.52506	1.4868	1.67656	4.41028	1.4021	0.5598	0.87189	1.0375	0.926037
2	117	L-Phenylalanine	0.944578	HMDB0000159	neg	L-苯丙氨酸	Amino acids	Amino acids, peptides, and analogues	28.9747	21.9492	30.0698	21.9589	30.0559	23.1313	20.4808	17.9228	26.7526	23.8186	32.9633	29.6326	28.5626	19.1941	29.056	16.9022	25.4977	23.5186	25.0206	57.3848	23.0463	28.8755	26.4301	32.0759	24.0419	21.1167	37.0333	27.2395	21.5337	27.9144	17.8133	26.5748	31.8413	28.4282	32.5168	35.2951	23.1184	17.249	19.6489	21.3192	20.2823
3	9	L-Serine	0.9998	HMDB0000187	pos	L-丝氨酸	Amino acids	Amino acids, peptides, and analogues	0.272158	0.243926	0.191057	0.257925	0.25889	0.277342	0.163635	0.231731	0.219385	0.253345	0.243118	0.330617	0.284007	0.28574	0.218758	0.178193	0.273464	0.221697	0.290427	0.56731	0.140308	0.304308	0.253029	0.420229	0.256621	0.0871892	0.433652	0.208967	0.211648	0.345546	0.233896	0.229162	0.165867	0.233007	0.251612	0.277422	0.230377	0.126183	0.205821	0.166737	0.1274
4	165	N-Acetyl-L-phenylalanine	0.86206	HMDB0000512	neg	N-乙酰-L-苯丙氨酸	Amino acids	Amino acids, peptides, and analogues	0.0721929	0.0358761	0.0501358	0.0334292	0.0555559	0.0444471	0.0335235	0.0376144	0.071409	0.0392753	0.0487848	0.0470198	0.0534219	0.0446132	0.0645559	0.0422522	0.0941105	0.0520042	0.0287673	0.0830136	0.0779158	0.0497056	0.0400782	0.0411152	0.0411016	0.0324875	0.041911	0.0491642	0.112128	0.0418622	0.0173033	0.0963451	0.0876492	0.0445938	0.110852	0.0455216	0.0537772	0.0585932	0.0661205	0.0729721	0.0669836
5	162	Phenylacetylglycine	0.864613	HMDB0000821	neg	苯乙酰甘氨酸	Amino acids	Amino acids, peptides, and analogues	0.901647	0.249817	0.508662	0.461056	0.691137	0.380405	0.460947	0.624213	0.925115	0.796747	0.824365	0.869758	0.718142	0.879963	0.9731	0.634489	1.882	0.779374	0.24318	0.398602	1.39738	0.692503	0.059601	0.51931	0.612932	0.322979	0.511696	0.646734	1.99164	0.527362	0.555871	1.64784	1.99672	0.616035	1.88741	0.23768	0.758208	1.13764	0.94547	1.46756	1.14387
6	15	L-Norleucine	0.999767	HMDB0001645	neg	L-正亮氨酸	Amino acids	Amino acids, peptides, and analogues	53.8593	35.6078	54.2349	36.5128	41.4526	32.1741	32.065	29.0626	47.7614	28.9237	47.7649	34.9793	39.0107	25.7642	49.0417	32.4188	43.5992	40.0782	36.5353	68.6816	34.6872	40.293	36.4181	47.8905	21.6151	38.4776	52.4823	39.4105	34.3708	52.4289	27.7723	56.229	45.6112	44.2756	83.8326	69.8256	39.5933	28.9771	37.0589	36.6549	29.4137
7	152	4-Guanidinobutanoic acid	0.931141	HMDB0003464	pos	4-胍基丁酸	Amino acids	Amino acids, peptides, and analogues	3.53582	4.32374	6.68011	4.66668	4.81363	5.76853	4.60763	3.49336	6.62577	7.12917	5.70749	5.74087	3.92392	3.88101	4.61248	6.6482	4.00802	3.9002	2.88903	5.30081	3.66207	4.87628	3.76533	4.59179	6.04668	3.63332	5.03877	5.00349	5.61899	3.46396	5.93501	7.21704	4.20634	4.33202	3.91329	3.62226	4.89093	4.68784	5.53452	4.46242	5.50016
8	211	Arginyl-Valine	0.851277	HMDB0028722	pos	精氨酰缬氨酸	Amino acids	Amino acids, peptides, and analogues	0.124428	0.148324	0.217847	0.207844	0.429284	0.210856	0.325277	0.184401	0.0790878	0.657792	0.431869	0.600832	0.507125	0.136408	0.114935	0.193783	0.0955713	0.0933883	0.32676	0.252623	0.16984	0.39817	0.109801	0.174878	0.316914	0.243532	0.168372	0.220313	0.29129	0.0938301	0.240692	0.181999	0.209328	0.200054	0.121698	0.408976	0.329916	0.110888	0.0758356	0.268036	0.216711
9	146	Asparaginyl-Arginine	0.935288	HMDB0028725	pos	天冬酰胺基精氨酸	Amino acids	Amino acids, peptides, and analogues	0.000910351	0.00145229	0.000186046	0.00017859	0.000179208	0.000180051	0.000172036	0.000183566	0.000712186	0.000186718	0.000166736	0.00194971	0.000174717	0.000188576	0.000169476	0.000182773	0.00123683	0.00205106	0.00792752	0.000172552	0.000174094	0.0011132	0.000174005	0.00740605	0.000178653	0.000160788	0.0010889	0.0001727	0.00136785	0.00234459	0.000950939	0.000169965	0.000175943	0.00112055	0.000176524	0.000176333	0.000178737	0.000182814	0.000160695	0.000169636	0.000177213
10	109	Glycyl-Histidine	0.970898	HMDB0028843	pos	甘氨酰组氨酸	Amino acids	Amino acids, peptides, and analogues	0.186733	0.166828	0.174304	0.156539	0.155406	0.175227	0.154351	0.156388	0.159958	0.155734	0.167951	0.166784	0.158378	0.170103	0.171736	0.175795	0.175991	0.199549	0.151382	0.134012	0.167534	0.15252	0.152985	0.155043	0.156065	0.160064	0.174755	0.154362	0.162063	0.164071	0.195808	0.171904	0.153011	0.184003	0.150125	0.178465	0.15571	0.159434	0.136633	0.149881	0.15002
11	74	Glycyl-Valine	0.988877	HMDB0028854	pos	甘氨酰缬氨酸	Amino acids	Amino acids, peptides, and analogues	0.00268945	0.00196454	0.00515919	0.00478803	0.0172906	0.00746604	0.00615932	0.0079216	0.000174183	0.0048214	0.0108165	0.080936	0.00699386	0.0273451	0.00595049	0.00432036	0.0287689	0.00018693	0.0083548	0.0105012	0.00717307	0.0130901	0.00265516	0.00279233	0.00512117	0.00919429	0.00353986	0.0129281	0.0161059	0.0138566	0.00955015	0.00454524	0.00415714	0.00145927	0.00398323	0.0120234	0.0106223	0.00707872	0.00591932	0.00636012	0.00976556
12	205	Histidinyl-Serine	0.856833	HMDB0028894	pos	组氨酸丝氨酸	Amino acids	Amino acids, peptides, and analogues	0.00883732	0.0112044	0.0202278	0.0147748	0.00956544	0.0142909	0.0173917	0.0116513	0.0122816	0.0300616	0.0379807	0.013229	0.0137323	0.0140346	0.0130819	0.029761	0.00893292	0.0139048	0.0119623	0.0264931	0.018816	0.0147921	0.0137984	0.00972511	0.0277818	0.0330507	0.0109557	0.0165992	0.0121509	0.0092167	0.0259093	0.0362683	0.0147142	0.0155892	0.0106813	0.0145218	0.0107778	0.0241829	0.0312641	0.0167461	0.0363455
13	96	Isoleucyl-Leucine	0.979387	HMDB0028911	pos	异亮氨酸亮氨酸	Amino acids	Amino acids, peptides, and analogues	0.0114826	0.0225927	0.0216275	0.0212894	0.0325463	0.00872699	0.0152807	0.0077688	0.0117191	0.0116551	0.00976888	0.0155778	0.0317847	0.0106366	0.00695991	0.0128878	0.00938744	0.00814684	0.0220974	0.0251676	0.010642	0.00793228	0.00499713	0.0129802	0.0169628	0.0171241	0.0169102	0.0227929	0.0288913	0.0128246	0.0166542	0.00888943	0.0126127	0.00471499	0.0105442	0.0185341	0.00761647	0.00594519	0.0200901	0.00849812	0.016304
14	204	Isoleucyl-Phenylalanine	0.857452	HMDB0028914	pos	异亮氨酰苯丙氨酸	Amino acids	Amino acids, peptides, and analogues	0.110591	0.0923732	0.124481	0.0883745	0.341777	0.0844002	0.135938	0.0363072	0.0573167	0.150688	0.158665	0.291199	0.241794	0.0890031	0.178342	0.0652386	0.0546074	0.0256792	0.218124	0.15874	0.132609	0.15262	0.0838539	0.195057	0.111644	0.200055	0.114712	0.212217	0.218569	0.115387	0.117229	0.114973	0.13574	0.0766057	0.0752357	0.340342	0.152488	0.0571617	0.0343924	0.074611	0.164514
15	177	Phenylalanyl-Threonine	0.896978	HMDB0029005	pos	苯丙氨酰苏氨酸	Amino acids	Amino acids, peptides, and analogues	0.00145943	0.000188055	0.00455298	0.00216811	0.00378228	0.00580944	0.00562292	0.000183566	0.000174183	0.0097688	0.00649588	0.00165624	0.0120615	0.00170425	0.00166859	0.00176909	0.000192605	0.00018693	0.00846324	0.0211566	0.000174094	0.0042596	0.00425336	0.0034803	0.000178653	0.00524737	0.00594827	0.00734521	0.0110226	0.00359827	0.000191668	0.000169965	0.0152554	0.00450103	0.000176524	0.00899989	0.00522802	0.00244732	0.000160695	0.00120938	0.00860354
16	66	Ustiloxin D	0.990838	HMDB0041054	pos	硫氧还蛋白D	Amino acids	Amino acids, peptides, and analogues	0.113139	0.112468	0.0655887	0.0404459	0.0676251	0.0478388	0.0628707	0.0506218	0.00180626	0.00824228	0.00241607	0.000188642	0.00173632	0.0668365	0.115527	0.0554617	0.0754364	0.00589987	0.0576917	0.0985589	0.0682981	0.051449	0.0785764	0.0656634	0.0918934	0.208045	0.0923072	0.0602418	0.0372365	0.0847784	0.350769	0.0137623	0.132354	0.0722003	0.0766781	0.104737	0.0862543	0.00628959	0.0123384	0.00417116	0.00940051
17	216	apo-[3-methylcrotonoyl-CoA:carbon-dioxide ligase (ADP-forming)]	0.847293	HMDB0059607	pos	氨基酸	Amino acids	Amino acids, peptides, and analogues	0.171516	0.0828886	0.248377	0.109043	0.133493	0.122008	0.192948	0.247861	0.0772542	0.468415	0.15618	0.117722	0.0948198	0.183572	0.110523	0.235597	0.0971347	0.170888	0.0851954	0.298548	0.719876	0.0496256	0.113932	0.254514	0.226794	0.264119	0.18801	0.416595	0.482721	0.0995868	0.190054	0.180584	0.224529	0.195346	0.54181	0.0920576	0.212494	0.471672	0.202056	0.221563	0.394019
18	107	L-Hexanoylcarnitine	0.973613	HMDB0000756	pos	L-己基肉碱	Fatty acid	Fatty acid esters	1.36064	0.562322	0.725831	0.247314	0.489815	0.781906	0.252748	0.6545	0.182047	0.331388	0.295152	0.404542	0.360936	0.408922	1.02478	0.446603	2.05069	1.22136	0.201062	0.496591	0.306206	0.186405	0.343037	0.35575	0.199013	0.480442	0.646477	0.353809	0.35614	0.580806	0.38842	0.908779	0.456347	0.790793	0.492481	0.364587	0.212324	0.55481	0.196899	0.135702	0.381333
19	81	Valeric acid	0.978304	HMDB0000892	neg	缬草酸	Fatty acid	Fatty acids and conjugates	0.000392975	0.000368114	0.000417066	0.000349943	0.000379526	0.000350496	0.000360433	0.000350893	0.000379267	0.000358021	0.000354627	0.000366226	0.00037927	0.000359839	0.792777	0.000356965	0.000367473	0.000378959	0.000398539	0.000380883	0.913262	0.00037745	0.00037033	1.21936	0.000374972	0.000351236	0.000381352	0.000376026	1.58639	0.000416587	0.000352139	0.000351346	0.000426346	0.000380732	0.000411772	0.00037658	0.906083	1.28502	0.000356271	2.42411	0.000366154
20	89	Leukotriene B4	0.970833	HMDB0001085	neg	白三烯B4	Fatty acid	Eicosanoids	0.261309	0.0654865	0.0335314	0.0394109	0.0940312	0.0508467	0.0616603	0.119269	0.0835989	0.0389083	0.0794115	0.0171834	0.0952401	0.0454224	0.078367	0.0609341	0.0676805	0.0807953	0.0574389	0.0573356	0.125758	0.0712982	0.032184	0.0461491	0.0826612	0.0447169	0.0647207	0.0517661	0.0407526	0.0741062	0.045714	0.0813136	0.0539302	0.0129628	0.101697	0.0372413	0.263149	0.0744984	0.0802868	0.0542853	0.091846
21	210	2-Ethyl-2-Hydroxybutyric acid	0.853771	HMDB0001975	pos	2-乙基-2-羟基丁酸	Fatty acid	Fatty acids and conjugates	0.114588	0.213733	0.0380118	0.0149056	0.0729991	0.0195688	0.0138389	0.0243596	0.000174183	0.000186718	0.000166736	0.00276314	0.000174717	0.0967144	0.0569412	0.0171624	0.0967259	0.00018693	0.0862727	0.0369284	0.0231699	0.0640259	0.124174	0.101844	0.0229543	0.115393	0.12913	0.0467074	0.0308075	0.134817	1.073	0.00628552	0.10909	0.0423263	0.0828395	0.125142	0.0456215	0.000182814	0.000160695	0.000169636	0.000177213
22	193	Prostaglandin F3a	0.801694	HMDB0002122	neg	前列腺素F3a	Fatty acid	Eicosanoids	0.174174	0.0108763	0.000417066	0.0144672	0.0439569	0.013954	0.00827858	0.0231801	0.017841	0.000358021	0.0391948	0.064871	0.052039	0.0630998	0.0517844	0.0198909	0.034025	0.0399269	0.0687173	0.0730042	0.0118059	0.0472429	0.0131405	0.0396303	0.0130078	0.0575326	0.0825569	0.0121307	0.0201087	0.131559	0.0243395	0.0281424	0.0624409	0.0121009	0.0255724	0.0638335	0.00614236	0.010929	0.0242291	0.0113379	0.0668559
23	172	Dodecanoylcarnitine	0.903137	HMDB0002250	pos	月桂酰-L-肉碱	Fatty acid	Fatty acid esters	1.06954	0.516578	0.454682	0.132874	0.312908	0.447788	0.149193	0.555926	0.146579	0.357837	0.195156	0.222599	0.214746	0.258354	0.555218	0.269334	1.23168	0.613416	0.0781642	0.254983	0.271511	0.111201	0.210404	0.19577	0.121383	0.26027	0.328382	0.131795	0.18355	0.298379	0.332658	0.458897	0.252895	0.4018	0.292149	0.236491	0.164711	0.396449	0.243117	0.0997837	0.359201
24	110	2-Hydroxymyristic acid	0.951144	HMDB0002261	neg	2-羟基肉豆蔻酸	Fatty acid	Fatty acids and conjugates	0.229393	0.126981	0.410751	0.167608	0.140293	0.0836002	0.151335	0.24067	0.0932841	0.171864	0.114764	0.105273	0.17152	0.260172	0.389218	0.169265	0.162026	0.15198	0.174056	0.120322	0.101442	0.0736235	0.153234	0.194655	0.0845797	0.214363	0.159908	0.251694	0.0724345	0.265007	0.161123	0.276564	0.26003	0.160193	0.170679	0.155223	0.0977813	0.0800506	0.0678533	0.0881601	0.212947
25	152	2,3-Dinor-6-keto-prostaglandin F1 a	0.884571	HMDB0002277	neg	脂肪酸	Fatty acid	Eicosanoids	0.0458947	0.0136431	0.0121528	0.013742	0.0200245	0.012923	0.018119	0.0273726	0.0126317	0.0129909	0.0124999	0.028563	0.028718	0.0268594	0.0217485	0.00505738	0.0187898	0.00509124	0.0352991	0.031229	0.0174023	0.0230691	0.0289909	0.0289471	0.0486306	0.0450112	0.0286057	0.0285277	0.0164961	0.0313003	0.0548323	0.0320919	0.0398862	0.00829356	0.00674492	0.0171989	0.0133782	0.0254487	0.0206061	0.0185906	0.0149139
26	122	Prostaglandin A2	0.940642	HMDB0002752	neg	前列腺素A2	Fatty acid	Eicosanoids	0.148306	0.0276728	0.0521776	0.0272785	0.0597727	0.0353176	0.0364231	0.0666927	0.0554189	0.0158667	0.0440403	0.0409261	0.0468328	0.0334503	0.0411338	0.0348955	0.0244172	0.0679671	0.110852	0.0645231	0.047358	0.0151895	0.0773996	0.0609711	0.0776405	0.0561215	0.0630798	0.0366042	0.0103186	0.0718689	0.0394973	0.0480421	0.0868214	0.0305193	0.0588522	0.0529837	0.0518768	0.0481443	0.116496	0.023839	0.0645597
27	51	9-OxoODE	0.992295	HMDB0004669	neg	脂肪酰	Fatty acid	Lineolic acids and derivatives	0.000392975	0.116437	0.0543302	0.0949463	0.0597815	0.000350496	0.0222887	0.0348352	0.320746	0.072186	0.349494	0.081021	0.0598573	0.171366	0.294846	0.0690056	0.000367473	0.0683757	0.0375248	0.0332684	0.0775368	0.00037745	0.0445494	0.030943	0.194361	0.100293	0.0567588	0.082229	0.0726656	0.000416587	0.0432724	0.11074	0.000426346	0.0247428	0.0428313	0.0326262	0.234191	0.107215	0.0305295	0.0213822	0.0211971
28	132	Lipoxin B4	0.92284	HMDB0005082	neg	脂氧素B4	Fatty acid	Eicosanoids	0.0532794	0.0109996	0.000417066	0.0135421	0.0330473	0.00730871	0.000360433	0.00600233	0.00383991	0.00307778	0.00762999	0.0112462	0.0118517	0.0164474	0.0149359	0.00201505	0.0281391	0.015219	0.0254864	0.0281244	0.00574595	0.0273035	0.00698458	0.0138133	0.0103559	0.0113498	0.110799	0.0115666	0.0402841	0.0390648	0.00655538	0.0125481	0.00588648	0.00533182	0.0315842	0.0672181	0.000353512	0.00394845	0.00216131	0.00698973	0.0138315
29	170	2,6 Dimethylheptanoyl carnitine	0.90415	HMDB0006320	pos	2,6-二甲基庚酰肉碱	Fatty acid	Fatty acid esters	0.242591	0.19232	0.0810177	0.0895338	0.110985	0.160931	0.0960257	0.275191	0.197645	0.106194	0.217249	0.0966171	0.118041	0.132834	0.143829	0.100009	0.370398	0.123227	0.107613	0.164348	0.189582	0.104178	0.165505	0.3296	0.0320027	0.152942	0.143638	0.0508876	0.109489	0.0978132	0.0849244	0.101734	0.0994009	0.118922	0.18256	0.0596947	0.0850455	0.110042	0.0671252	0.171819	0.0919591
30	161	5-HETE	0.866997	HMDB0011134	neg	脂肪酸	Fatty acid	Eicosanoids	0.160223	0.0271368	0.000417066	0.0110718	0.000379526	0.114342	0.000360433	0.313593	0.000379267	0.016893	0.0318452	0.000366226	0.0663834	0.000359839	0.0298905	0.0586622	0.0107403	0.00773839	0.000398539	0.000380883	0.155798	0.00037745	0.00037033	0.0195164	0.0056245	0.000351236	0.0705463	0.00521188	0.000347281	0.0313779	0.0297632	0.0361809	0.00636019	0.000380732	0.0536986	0.0458402	0.0191844	0.000356224	0.0312972	0.00951052	0.000366154
31	150	Aeglin	0.933162	HMDB0041415	pos	脂肪酰	Fatty acid	Fatty acyl glycosides	0.014844	0.0119214	0.0108586	0.00530029	0.00458095	0.00131277	0.00176708	0.00242938	0.000174183	0.00180631	0.0119012	0.00187612	0.00304833	0.00630013	0.0110875	0.00365763	0.00404917	0.00018693	0.000165124	0.00923352	0.00836416	0.00209203	0.00586106	0.00966145	0.00227449	0.0225692	0.00457885	0.00483743	0.00351336	0.0113992	0.0496945	0.0226097	0.0142218	0.00357066	0.00891677	0.00934044	0.00800086	0.00165992	0.00348282	0.00208583	0.00189746
32	97	Glycerol tripropanoate	0.979039	HMDB0032857	pos	三丙酸甘油酯	Glycerolipids	Triradylcglycerols	0.275057	0.406862	0.0894465	0.0246232	0.173401	0.0887581	0.0919335	0.146616	0.0137919	0.000186718	0.000166736	0.0120056	0.000174717	0.190028	0.189893	0.0662561	0.237201	0.00018693	0.147258	0.0691486	0.135792	0.187207	0.232837	0.223145	0.125757	0.288386	0.267189	0.112876	0.110526	0.254232	1.08894	0.0753633	0.233609	0.146547	0.195809	0.275673	0.170949	0.000182814	0.00626391	0.0134116	0.00747112
33	189	Glycerophosphocholine	0.879046	HMDB0000086	pos	甘磷酸胆碱	Glycerophosphocholines	Glycerophosphocholines	4.80761	3.54116	2.14579	1.59398	2.16408	1.20871	1.64962	1.60503	2.11401	1.21928	1.90668	6.21206	3.41696	1.71341	4.20691	1.51686	1.67266	1.33652	2.3894	5.00999	2.11528	1.57166	3.38484	2.62104	1.4057	1.46073	1.80689	2.74974	2.9382	4.54239	1.06042	1.60405	2.00425	1.85728	2.01731	2.87656	2.18433	1.73435	1.25264	1.57011	2.04505
34	242	PC(16:0/16:0)	0.807981	HMDB0000564	pos	甘油脂	Glycerophosphocholines	Glycerophosphocholines	6.18035	4.57765	5.66535	4.71087	4.69678	3.93349	3.48104	3.81675	4.8378	4.44453	5.63343	4.02272	4.49627	2.87734	6.17564	3.80351	5.14721	4.12223	3.16746	3.6442	2.84862	2.93296	2.90757	3.44754	2.56836	2.96656	2.69864	2.65396	2.05648	2.56137	1.60591	2.54312	3.53059	3.18149	4.52078	2.42498	2.56102	2.26136	3.33725	3.00817	3.87627
35	229	LysoPC(P-18:1(9Z))	0.830493	HMDB0010408	pos	甘油磷脂	Glycerophosphocholines	Glycerophosphocholines	0.0230374	0.024737	0.0279216	0.0164887	0.0295891	0.0125587	0.0139398	0.00589704	0.0153206	0.0161909	0.0130105	0.0198828	0.0407846	0.0184241	0.0279556	0.0128563	0.0183604	0.011845	0.0150808	0.0306974	0.0288965	0.0200766	0.0183794	0.0212722	0.0210471	0.0150781	0.018913	0.0147226	0.0163987	0.0183723	0.0217707	0.0173634	0.0200698	0.0193014	0.0156797	0.0173371	0.0168228	0.0164992	0.0113767	0.0160717	0.0169092
36	84	2-Ketobutyric acid	0.976054	HMDB0000005	neg	2-酮基丁酸	Organics	Short-chain keto acids and derivatives	1.62467	1.15858	1.56103	1.25902	2.0267	2.47823	1.25489	1.35464	1.03196	1.27068	1.17757	1.65455	1.41176	1.34708	1.1646	0.971781	1.04138	1.38123	3.86687	1.92645	1.31723	3.22033	1.42513	2.75249	1.40862	0.826067	1.71994	1.86271	1.22931	3.15993	1.07746	1.63648	2.07748	1.34483	1.50449	2.00477	1.24351	0.952379	1.02134	1.15834	1.13396
37	16	Betaine	0.999552	HMDB0000043	pos	甜菜碱	Organics	Amino acids, peptides, and analogues	51.733	63.8568	46.2232	32.6639	41.7371	62.2079	26.2636	39.1594	29.86	40.6249	38.6631	35.8404	39.7156	61.6278	54.38	37.0112	60.5539	43.012	33.7249	63.8871	36.5784	25.2995	29.7021	40.897	53.5116	35.587	41.0763	30.5062	43.441	73.4452	27.8326	41.4474	32.7134	44.5938	26.2592	38.4529	32.155	39.196	29.6608	29.4016	28.9412
38	42	Citric acid	0.997368	HMDB0000094	pos	柠檬酸	Organics	Tricarboxylic acids and derivatives	0.0244617	0.0216589	0.0294356	0.0288425	0.0317702	0.0221417	0.0204476	0.0154168	0.0162414	0.000186718	0.0381879	0.0268344	0.0232774	0.0192561	0.0292325	0.0260929	0.0286963	0.0289895	0.0182801	0.0560257	0.0188416	0.0196712	0.0264613	0.0362042	0.0298361	0.0263013	0.0382056	0.0257494	0.0216163	0.02325	0.0211198	0.0353805	0.0198071	0.0349617	0.0247717	0.0346121	0.0219334	0.0274589	0.0240702	0.0243503	0.028132
39	6	Choline	0.999837	HMDB0000097	pos	胆碱	Organics	Quaternary ammonium salts	93.6589	66.5609	94.6455	73.3119	73.364	74.4359	34.7437	30.3409	10.2989	82.5505	78.1624	23.7094	10.4447	6.6107	90.6167	41.7903	81.5212	65.6587	60.7867	149.935	81.5866	2.43298	69.388	100.81	99.5651	89.3228	96.6553	90.6104	12.1821	52.4562	18.5961	83.8324	83.6274	96.2512	84.7247	89.3069	38.0578	52.2002	71.3536	20.6263	86.0637
40	12	Hypoxanthine	0.999637	HMDB0000157	pos	次黄嘌呤	Organics	Purines and purine derivatives	58.5741	27.3868	41.929	32.1365	37.8997	54.9068	45.269	31.7725	31.3125	86.9979	70.7103	86.0095	61.0544	29.7314	51.2498	47.5054	45.9654	50.5747	32.0984	44.18	52.1734	32.1837	39.1342	48.4042	37.4133	55.2955	39.0331	46.9389	48.0284	76.387	42.4191	59.9718	66.3847	36.1424	50.4227	73.6957	41.4698	34.7466	34.9484	53.2703	78.1591
41	102	Succinic acid	0.958198	HMDB0000254	neg	琥珀酸	Organics	Dicarboxylic acids and derivatives	10.6611	7.62539	11.104	6.93654	9.30423	7.45858	6.65934	5.93175	8.58927	8.25299	7.75266	9.0834	8.52605	6.63857	10.4387	6.5464	8.12952	8.5973	9.4454	10.8481	9.42489	9.21862	7.92771	8.76084	8.22111	7.27299	10.417	10.5769	7.25941	9.79311	6.57965	8.39307	11.4684	9.3768	10.3577	9.82303	7.10707	6.67118	8.0088	7.28373	7.43997
42	85	Uridine	0.976006	HMDB0000296	neg	尿苷	Organics		25.1466	24.4684	21.6933	16.8809	21.9555	20.0109	14.9726	15.4031	17.77	22.0694	18.3408	25.1001	21.8975	14.8954	22.1524	21.725	21.1946	21.5897	15.5097	17.0612	19.9795	15.0473	20.4793	18.0603	20.4936	17.5448	25.5936	20.246	21.6793	28.6817	17.145	15.1297	30.6131	24.3199	25.7482	23.5436	15.3835	13.8875	18.885	18.11	25.1014
43	19	3-Methyl-2-oxovaleric acid	0.999552	HMDB0000491	neg	3-甲基-2-氧基戊酸	Organics	Short-chain keto acids and derivatives	162.613	112.808	214.009	137.901	162.193	115.453	131.453	78.6544	160.116	92.815	98.5923	129.37	137.455	105.679	194.594	66.2457	154.271	167.534	134.82	113.534	170.876	161.053	118.426	180.84	186.944	137.917	173.719	103.491	258.433	259.179	91.5666	135.667	289.692	138.958	158.509	129.762	88.1088	263.397	140.029	106.753	120.382
44	151	Hydroxypyruvic acid	0.885829	HMDB0001352	neg	羟基丙酮酸	Organics	Beta hydroxy acids and derivatives	0.648052	0.51153	0.786615	0.630217	0.527684	0.942396	0.804136	1.28007	0.803723	0.787544	0.911299	0.720939	0.856063	0.855972	0.795629	0.751639	0.483145	0.610733	0.664744	0.851383	0.852305	1.00597	0.854882	0.610267	0.802647	0.713845	0.61843	0.866591	0.643585	0.830537	0.93548	0.463698	0.910868	0.59377	0.888053	0.879694	0.753086	0.689949	0.693636	0.873242	0.844715
45	190	Calcitriol	0.877845	HMDB0001903	pos	骨化三醇	Organics	Vitamin D and derivatives	0.0200471	0.00878433	0.0115085	0.00896397	0.0250713	0.0132046	0.00287734	0.0192872	0.0188514	0.0198221	0.00887524	0.0164947	0.0103259	0.0192308	0.011859	0.00824019	0.00931353	0.0175834	0.012592	0.0212484	0.0107418	0.014704	0.0158494	0.016713	0.00960212	0.00766136	0.0138224	0.0156929	0.00937623	0.0137729	0.00925515	0.0166192	0.0138609	0.0130113	0.0129401	0.0152185	0.0107333	0.000182814	0.0102597	0.00811449	0.0101068
46	80	Formylanthranilic acid	0.978517	HMDB0004089	neg	2-甲酰胺基苯甲酸	Organics	Benzoic acids and derivatives	2.13085	0.609297	0.867236	0.161706	0.269524	0.411212	0.336915	0.248085	0.29927	0.137466	0.613906	0.0651655	0.3554	0.415871	0.448735	0.702283	0.71237	0.538756	0.465251	1.58984	0.42141	0.530856	0.317659	0.196968	0.549717	1.11217	0.959851	0.265147	0.135718	0.211766	0.331621	0.554189	0.0964669	0.401306	0.864408	0.232801	0.179006	1.20612	0.610292	0.11949	0.752557
47	90	Nivalenol	0.982987	HMDB0004304	pos	瓜萎镰菌醇	Organics	Sesquiterpenoids	0.0868879	0.0753936	0.0327538	0.0194074	0.0326701	0.0286176	0.0341325	0.0360651	0.0134175	0.00925538	0.024754	0.0105903	0.0103204	0.0331336	0.0748821	0.0229554	0.0522306	0.00909682	0.0325178	0.0506749	0.0473061	0.0276601	0.0604712	0.036154	0.0317576	0.0747048	0.0503327	0.0358773	0.0186266	0.042574	0.0816807	0.0267207	0.0677617	0.0338726	0.0484075	0.0651393	0.0443758	0.0112643	0.00851681	0.00772472	0.0116878
48	121	20-Hydroxyeicosatetraenoic acid	0.940763	HMDB0005998	neg	20-HETE	Organics		0.468639	0.177034	0.12689	0.0415716	0.298117	0.109905	0.0479896	0.431563	0.0533342	0.0442379	0.294141	0.303121	0.51118	0.133901	0.556177	0.227692	0.0148461	0.0149422	0.0253495	0.955409	0.214211	0.0689127	0.0402959	0.135524	0.0580684	0.253278	0.0983849	0.206236	0.114265	0.474138	0.116733	0.127592	0.0887797	0.0261046	0.10095	2.04505	0.000353512	0.0137215	0.0460249	0.0584133	0.152574
49	61	Disialosyl galactosyl globoside	0.992446	HMDB0006588	pos	二烯丙基半乳糖基珠糖苷	Organics	Carbohydrates and carbohydrate conjugates	0.00847208	0.00328558	0.00531913	0.00337438	0.0135583	0.00798076	0.00785377	0.00158857	0.00269534	0.0119291	0.00281362	0.0226906	0.0105731	0.0046655	0.00795516	0.00594949	0.00769507	0.00189897	0.00651116	0.0176304	0.00783645	0.00418511	0.00662535	0.00830237	0.00454958	0.00129866	0.0056195	0.0091829	0.0116682	0.00329485	0.00248884	0.00906526	0.0145459	0.00801394	0.0035719	0.0141118	0.00754007	0.00317958	0.00347162	0.00296517	0.0073023
50	212	1-Pyrroline-2-carboxylic acid	0.850612	HMDB0006875	pos	1-吡咯啉-2-羧酸	Organics		0.118617	0.119233	0.267451	0.251765	0.127288	0.178762	0.279681	0.163725	0.334462	0.204286	0.100873	0.219751	0.11694	0.220531	0.17856	0.0928762	0.354138	0.0894396	0.280514	0.172231	0.309205	0.145465	0.307428	0.192654	0.11061	0.164584	0.169742	0.132254	0.157612	0.194955	0.091523	0.13761	0.312418	0.119155	0.185859	0.0947661	0.134451	0.278587	0.103628	0.224867	0.220994
51	14	1-Pyrroline	0.999563	HMDB0012497	pos	有机杂环化合物	Organics		1.61624	1.6033	2.04688	1.67536	1.49383	1.61022	1.21651	1.73342	1.88558	1.63973	1.62779	1.68035	1.6685	1.47541	2.26472	1.4891	1.80392	2.08892	1.8547	2.50762	1.54122	1.79045	1.56547	2.09628	1.91125	1.55174	1.91225	1.81701	1.42475	1.8965	1.24259	1.59492	1.7941	1.62879	1.4898	1.48268	1.57399	1.80991	1.78244	1.59936	1.81757
52	186	Bortezomib	0.816201	HMDB0014334	neg	硼替佐米	Organics	Amino acids, peptides, and analogues	0.0813518	0.077323	0.0383567	0.0134832	0.035107	0.0208129	0.0329796	0.0294142	0.000379267	0.000358021	0.000354627	0.00179917	0.00037927	0.0275577	0.0673524	0.015386	0.0539797	0.000378959	0.0412438	0.0442389	0.0366668	0.0176635	0.0437061	0.0445549	0.0339597	0.0825736	0.0631856	0.0353202	0.0250706	0.0554103	0.101528	0.0267205	0.068618	0.04481	0.0564949	0.0688498	0.0411468	0.000356224	0.00168112	0.000379707	0.00191958
53	115	Mitomycin	0.966107	HMDB0014450	pos	丝裂霉素	Organics	Indolequinones	0.109035	0.0689837	0.116145	0.0792097	0.211959	0.122482	0.134667	0.0371087	0.053677	0.203081	0.0750198	0.258162	0.123537	0.0824155	0.125768	0.111437	0.07073	0.0217951	0.0831255	0.229299	0.101532	0.0730193	0.125892	0.120949	0.0839736	0.172297	0.112074	0.135112	0.185011	0.0686998	0.0817002	0.0887164	0.183091	0.0793615	0.04604	0.161671	0.10592	0.0441064	0.0401003	0.0578956	0.159996
54	117	Tamsulosin	0.965512	HMDB0014844	pos	坦索洛新	Organics	Phenethylamines	0.0338912	0.0878108	0.000186046	0.00676613	0.0198992	0.0107413	0.000172036	0.0101603	0.000174183	0.000186718	0.000166736	0.00184862	0.000174717	0.00893677	0.0315455	0.000182773	0.00521282	0.00018693	0.0120726	0.0334259	0.0155591	0.00336448	0.0227492	0.0131885	0.0177702	0.0592985	0.0156866	0.0132907	0.0090496	0.000188584	1.0225	0.010612	0.0533992	0.00901982	0.0315139	0.0530043	0.0396499	0.000182814	0.0038817	0.00272376	0.000177213
55	84	Fludarabine	0.986623	HMDB0015206	pos	氟达拉滨	Organics	Purine ribonucleotides	0.178335	0.184198	0.203836	0.191493	0.176222	0.193169	0.185826	0.195171	0.179166	0.188349	0.184722	0.18666	0.180748	0.18662	0.168437	0.202548	0.188376	0.184364	0.161597	0.177054	0.193547	0.188558	0.184554	0.173937	0.202023	0.176823	0.199412	0.18495	0.200021	0.196022	0.202195	0.187556	0.178294	0.182405	0.166031	0.185213	0.177732	0.206821	0.179641	0.195748	0.190992
56	171	3-Feruloyl-1,5-quinolactone	0.903872	HMDB0029289	pos	3-阿魏酰-1,5-醌内酯	Organics	Hydroxycinnamic acids and derivatives	0.00699614	0.00532446	0.00761905	0.0055764	0.0123157	0.00341852	0.00729825	0.00465312	0.00164728	0.0167332	0.00410365	0.0175036	0.00960594	0.00520331	0.00944108	0.00678183	0.00119382	0.00018693	0.00393872	0.0188046	0.00757005	0.00260653	0.00915869	0.00605698	0.0014848	0.0176588	0.00724356	0.0102595	0.0134581	0.00308652	0.00832376	0.00304639	0.0139587	0.00265077	0.00261128	0.0148604	0.0080707	0.00551411	0.00113304	0.00226405	0.0124603
57	1	Ceanothine E	0.999968	HMDB0029342	pos	美洲茶碱E	Organics	Amino acids, peptides, and analogues	0.011911	0.0580751	0.000186046	0.00017859	0.0020426	0.000180051	0.000172036	0.000183566	0.0147186	0.000186718	0.0043587	0.0158548	0.00520573	0.000188576	0.00819175	0.00321475	0.00262527	0.00836071	0.000165124	0.00229317	0.00228642	0.000170224	0.000174005	0.00221994	0.00449091	0.0133563	0.00019271	0.0001727	0.000185571	0.00475806	2.40141	0.00181509	0.00258336	0.00173808	0.000176524	0.000176333	0.00971478	0.000182814	0.0274584	0.0196016	0.00522085
58	214	1-Methyl-1,3-cyclohexadiene	0.850066	HMDB0031532	pos	1-甲基-1,3-环己二烯	Organics	Cyclic olefins	0.0889257	0.0771587	0.0963056	0.0614937	0.0948216	0.0707856	0.0862323	0.0666648	0.0680375	0.111777	0.0707789	0.0811082	0.0497111	0.0557052	0.0792824	0.0802301	0.0844696	0.0675994	0.0867766	0.107404	0.083677	0.0687062	0.0596694	0.0720229	0.0706184	0.0781102	0.0690036	0.0763231	0.0998496	0.058531	0.0450538	0.0706811	0.0633082	0.0613759	0.0826761	0.0590381	0.0740749	0.0520608	0.0666612	0.0700433	0.0818488
59	1	Acrylic acid	1	HMDB0031647	neg	丙烯酸	Organics	Acrylic acids and derivatives	0.42137	1.97863	1.14416	1.84354	0.962158	1.95094	0.787817	1.53955	0.770693	1.18366	2.54206	1.72288	0.797942	2.05485	0.862662	0.822376	0.794718	2.20356	0.778045	2.82967	2.2814	2.10938	2.50912	1.79055	3.07093	2.17081	0.960693	1.68725	0.562244	0.546735	2.1837	2.04764	0.753194	1.78121	0.799328	2.54566	2.016	1.23031	2.69809	1.2817	2.58478
60	207	1,9-Nonanedithiol	0.85591	HMDB0031710	pos	1,9-壬二硫醇	Organics	Alkylthiols	0.0765077	0.0788715	0.0699058	0.0838714	0.0774815	0.108714	0.0990609	0.0967712	0.0670187	0.0848984	0.0674357	0.0808123	0.0794978	0.113349	0.0799898	0.105325	0.0974788	0.0885601	0.0861475	0.0625718	0.08812	0.0764277	0.0731988	0.0807925	0.0946497	0.0776258	0.0963496	0.0743551	0.100218	0.0989873	0.0831258	0.0798283	0.111545	0.0938538	0.0860867	0.074159	0.0835749	0.0949067	0.0578282	0.0825866	0.0754231
61	62	D-2,3-Dihydroxypropanoic acid	0.988325	HMDB0031818	neg	糖类	Organics	Carbohydrates and carbohydrate conjugates	6.36806	4.56271	5.28863	3.18815	5.09718	3.46419	2.68782	3.48108	4.6596	4.09189	3.86664	5.53573	4.18682	3.7923	5.26161	2.59822	5.73732	3.90654	4.37801	7.85252	6.31662	4.01643	5.12304	5.262	5.3809	3.5614	5.58344	4.55819	3.45549	5.80793	2.46043	4.92984	7.34068	4.40233	7.77303	5.77603	3.89674	3.46271	4.01382	3.62134	3.30825
62	33	3-(1,1-Dimethylallyl)scopoletin 7-glucoside	0.998439	HMDB0032853	pos	3-(1,1-二甲基烯丙基)东莨菪内酯7-葡萄糖苷	Organics	Coumarin glycosides	0.0457025	0.0501466	0.026632	0.0186887	0.0265238	0.0111425	0.0227659	0.0151829	0.000174183	0.00261188	0.000166736	0.000188642	0.000174717	0.0258818	0.0434932	0.013066	0.0241105	0.00018693	0.016362	0.0258899	0.0256645	0.0110967	0.0281703	0.0237546	0.0260594	0.0657491	0.0316391	0.0255918	0.0122101	0.0246717	0.0738288	0.0194843	0.0465446	0.0211257	0.036837	0.0387115	0.0294178	0.00168959	0.00118624	0.00106418	0.00262736
63	26	Honyucitrin	0.998931	HMDB0033536	pos	黄酮	Organics	Flavones	0.410343	0.399165	0.240197	0.183033	0.257396	0.192686	0.263865	0.209103	0.00440898	0.0204932	0.00511131	0.00241111	0.00176986	0.269345	0.423929	0.223848	0.256078	0.00901006	0.202731	0.328297	0.31119	0.160863	0.337799	0.226418	0.31206	0.683642	0.307231	0.251835	0.149794	0.247913	0.700772	0.219984	0.470412	0.275073	0.316927	0.367777	0.275868	0.00508517	0.0235361	0.00884055	0.0103838
64	43	Ssioriside	0.997113	HMDB0038934	pos	木脂素	Organics		0.000184419	0.0108319	0.000186046	0.00017859	0.00391032	0.000180051	0.00152364	0.000183566	0.000174183	0.00132694	0.000166736	0.000188642	0.000174717	0.000188576	0.00550787	0.00140951	0.0025409	0.00018693	0.00112484	0.000172552	0.00383445	0.00109185	0.000174005	0.000174665	0.000178653	0.00549239	0.00147338	0.00163762	0.000185571	0.00559084	0.0193673	0.00156075	0.000175943	0.000181082	0.00191142	0.00218968	0.00257004	0.000182814	0.000160695	0.000169636	0.000177213
65	110	2-(3,4-Dihydroxyphenylethyl)-6-epi-elenaiate	0.969684	HMDB0039137	pos	酚类	Organics	Tyrosols and derivatives	0.0713943	0.0773463	0.0354205	0.0208586	0.0337027	0.0241818	0.0328837	0.0330665	0.000174183	0.000186718	0.000166736	0.000188642	0.000174717	0.0358569	0.0703892	0.0309677	0.0410172	0.00018693	0.0319143	0.04296	0.0447159	0.0304782	0.0498282	0.0358804	0.0330107	0.0814102	0.0493131	0.0368799	0.0226378	0.0398901	0.0919546	0.0249887	0.0639571	0.0412864	0.0583466	0.0516297	0.0429725	0.000182814	0.000160695	0.000169636	0.000177213
66	13	Kanzonol I	0.999634	HMDB0040606	pos	异黄酮	Organics	Pyranoisoflavonoids	0.114308	0.147021	0.00775377	0.0057593	0.0354859	0.0312957	0.011598	0.0292137	0.0148318	0.000186718	0.0132373	0.00735473	0.000174717	0.0517428	0.0566786	0.00312343	0.0371629	0.00565293	0.0235811	0.0382481	0.0327151	0.039283	0.0579454	0.0455308	0.048328	0.135497	0.0748897	0.016383	0.0171815	0.0460376	3.39756	0.0280176	0.0932322	0.0439639	0.0720436	0.0929193	0.0386285	0.000182814	0.0369576	0.0130134	0.0162433
67	79	1-O-2'-Hydroxy-4'-methoxycinnamoyl-b-D-glucose	0.987594	HMDB0040866	pos	1-O-2'-羟基-4'-甲氧基肉桂酰-b-D-葡萄糖	Organics	Hydroxycinnamic acids and derivatives	0.0222625	0.0136036	0.0221338	0.0162476	0.0411153	0.0224518	0.020808	0.00955196	0.0102641	0.0400305	0.0175379	0.0543928	0.027323	0.018991	0.0283024	0.0214315	0.017108	0.00311158	0.0191721	0.053803	0.0247585	0.0185463	0.035215	0.0490265	0.0240179	0.0388883	0.0293836	0.0334407	0.0332455	0.0264691	0.0171601	0.0276158	0.0453891	0.022729	0.0147643	0.0374812	0.0230348	0.0101018	0.0106725	0.0123536	0.0313942
68	5	Foeniculoside VII	0.999921	HMDB0041546	pos	萜苷	Organics	Terpene glycosides	0.20205	0.30116	0.0765481	0.00789569	0.142843	0.0487883	0.0250845	0.0786011	0.00943738	0.000186718	0.000166736	0.000188642	0.000174717	0.166229	0.173286	0.0421831	0.20404	0.00018693	0.118513	0.0611973	0.0769373	0.130811	0.167102	0.176289	0.110175	0.270908	0.219797	0.0603549	0.108856	0.169755	1.92151	0.0499093	0.264189	0.0548886	0.16017	0.168342	0.118896	0.000182814	0.00455633	0.000169636	0.000177213
69	52	Sofalcone	0.99547	HMDB0042013	pos	苯丙素	Organics		0.230174	0.202422	0.145645	0.103363	0.138972	0.0937448	0.135347	0.102477	0.0075903	0.00965456	0.00627753	0.00409813	0.00410664	0.146524	0.235706	0.128698	0.141303	0.00760471	0.120802	0.166755	0.163865	0.0981981	0.172125	0.127083	0.183609	0.396112	0.178448	0.137661	0.0827391	0.1348	0.512922	0.115741	0.269283	0.157996	0.169156	0.203791	0.161841	0.00557476	0.0134196	0.0089936	0.0175739
70	234	Acetone cyanohydrin	0.819712	HMDB0060427	pos	其它	Organics	Alcohols and polyols	0.130288	0.145653	0.168462	0.136221	0.142238	0.142995	0.121317	0.108593	0.180051	0.177304	0.163521	0.167091	0.137688	0.134849	0.136461	0.149268	0.114561	0.15274	0.112216	0.183227	0.129283	0.148225	0.134654	0.164333	0.175056	0.101976	0.173452	0.129712	0.140658	0.136813	0.145155	0.18696	0.12765	0.1517	0.119125	0.117621	0.152798	0.157143	0.152617	0.149577	0.148457
71	62	N-Acetylmuramoyl-Ala	0.991956	HMDB0060494	pos	其它	Organics	Carbohydrates and carbohydrate conjugates	0.0203891	0.0967517	0.00847233	0.00017859	0.0136181	0.000180051	0.00484382	0.00723564	0.000174183	0.000186718	0.000166736	0.000188642	0.000174717	0.0113655	0.0516213	0.000182773	0.0147594	0.00018693	0.0180826	0.00757762	0.00993727	0.00485783	0.0191962	0.0230875	0.00574809	0.0832166	0.0293295	0.00644217	0.014954	0.0199924	0.336002	0.000169965	0.0275597	0.00742922	0.0147417	0.0226486	0.00924397	0.000182814	0.000160695	0.000169636	0.000177213
72	203	alpha-Hydroxytamoxifen	0.858282	HMDB0060585	pos	芪类	Organics		0.0815071	0.0684521	0.0974488	0.0747164	0.261135	0.0588319	0.111049	0.0579454	0.022471	0.244836	0.218167	0.262944	0.158131	0.0701074	0.0734213	0.0329776	0.0536119	0.0232486	0.18232	0.0507737	0.0895211	0.183844	0.0334122	0.0936395	0.0627106	0.0533616	0.0895378	0.0956875	0.109724	0.0837157	0.0732152	0.0623381	0.106985	0.062645	0.0601469	0.150016	0.161736	0.049417	0.0309441	0.0877237	0.0781192
73	129	Diethyl phthalic acid	0.925622	HMDB0094660	neg	二乙基邻苯二甲酸	Organics	Benzoic acids and derivatives	0.10026	0.107275	0.180004	0.0436483	0.074355	0.0850564	0.100541	0.0513231	0.165109	0.0203974	0.0423713	0.130081	0.0861436	0.31817	0.14548	0.0674109	0.0851349	0.074384	0.0747303	0.0674129	0.0547984	0.12562	0.11243	0.14026	0.154994	0.0233441	0.147619	0.208972	0.0885908	0.0664317	0.18079	0.163032	0.0468006	0.0960504	0.108584	0.106012	0.147309	0.0987297	0.0824307	0.196465	0.0652818
74	121	Cholesterol	0.960827	HMDB0000067	pos	胆固醇	Steroids and steroid derivatives	Cholestane steroids	0.466658	0.245564	0.418096	0.348619	0.234637	0.366163	0.326008	0.262387	0.322164	0.35128	0.254995	0.150727	0.305694	0.371481	0.246014	0.333664	0.397477	0.471836	0.286413	0.253519	0.279546	0.22406	0.239272	0.225069	0.426718	0.836198	0.458292	0.480692	0.324112	0.355815	0.406071	0.465329	0.307174	0.373199	0.339508	0.319648	0.434982	0.000182814	0.332498	0.297825	0.306142
75	195	Cholesta-4,6-dien-3-one	0.870411	HMDB0002394	pos	4,6-胆固醇二烯-3-酮	Steroids and steroid derivatives	Cholestane steroids	0.0832655	0.0783856	0.0789474	0.074355	0.0864178	0.0726719	0.0533455	0.0873126	0.074834	0.0838199	0.0518498	0.0666104	0.0529049	0.0622767	0.0868708	0.0451586	0.10593	0.0597762	0.0540078	0.0726206	0.075541	0.0472366	0.0614485	0.0543188	0.0670634	0.103048	0.07211	0.0907841	0.0984147	0.0865657	0.0490533	0.0887888	0.0839798	0.0793952	0.078962	0.0557602	0.0772687	0.089289	0.0566877	0.0640528	0.063566
76	51	Tetrahydroaldosterone-3-glucuronide	0.995693	HMDB0010357	pos	甾体	Steroids and steroid derivatives	Steroidal glycosides	0.0181887	0.0139701	0.000186046	0.00017859	0.0159398	0.00196931	0.000172036	0.00242391	0.0107862	0.000186718	0.0208415	0.00529558	0.00321423	0.0161527	0.0122521	0.000182773	0.0205535	0.0175003	0.0128646	0.00801343	0.00237334	0.00841379	0.0085616	0.0220666	0.000178653	0.0458916	0.0211905	0.0001727	0.000185571	0.0256003	2.01969	0.00320925	0.0342449	0.00598787	0.00977775	0.01018	0.000178737	0.000182814	0.0475467	0.000169636	0.0062602
77	215	Betamethasone	0.849005	HMDB0014586	pos	倍他米松	Steroids and steroid derivatives	Hydroxysteroids	0.16105	0.186718	0.00806572	0.00650094	0.0617317	0.000180051	0.00656969	0.0268734	0.0136758	0.000186718	0.00399737	0.000188642	0.000174717	0.0568533	0.025874	0.00792241	0.0585689	0.00414321	0.0645789	0.0251223	0.0439622	0.0670044	0.0908626	0.0504943	0.0136154	0.191145	0.0735267	0.0296858	0.00650238	0.0619072	2.5384	0.00700895	0.109731	0.0199776	0.0817673	0.0498129	0.0491377	0.000182814	0.0208112	0.000169636	0.000177213
78	102	Fluocinolone Acetonide	0.975957	HMDB0014729	pos	盐酸氟环松	Steroids and steroid derivatives	Hydroxysteroids	0.0371878	0.0507432	0.00644371	0.00017859	0.01233	0.00612466	0.00382858	0.0106225	0.000174183	0.000186718	0.000166736	0.000188642	0.000174717	0.00649013	0.0252783	0.000182773	0.0159525	0.00018693	0.00706513	0.0281015	0.00801407	0.00369656	0.0156245	0.000174665	0.000178653	0.0410486	0.00897243	0.00583412	0.00754615	0.00824487	1.33024	0.00701857	0.0130432	0.00628116	0.000176524	0.0468508	0.0220489	0.000182814	0.00411491	0.00833536	0.000177213
79	191	Desglucocheirotoxin	0.876398	HMDB0034362	pos	去葡萄糖桂竹香毒甙	Steroids and steroid derivatives	Steroid lactones	0.0542615	0.0456566	0.059736	0.0674649	0.114003	0.0597295	0.0790505	0.0515816	0.02793	0.22334	0.116916	0.0956845	0.054516	0.0423319	0.0759196	0.0309869	0.0475297	0.0196139	0.0943078	0.0977743	0.0676975	0.0676685	0.0534892	0.0698147	0.0473973	0.0362789	0.0499376	0.0719868	0.0593477	0.0450552	0.0527716	0.0607398	0.0972918	0.0656577	0.0509466	0.0832014	0.113668	0.048323	0.0322459	0.0617741	0.0593213
Metabolites with VIP > 1.0 andq-value < 0.05 were deemed statistically different. The q-value column was based on nonparametric Mann–Whitney U-test Benjamini-Hochberg correction of the normalized MS data,.
b The FC was calculated by the average mass response (area) ratio (FC = AD/NAD).
Abbreviations: ESI electrospray ionization, VIP, importance in the projection; FC, fold change; Rt, retention time
[truncated: 26 more columns]
